# Supplementary material for: Solution processable diketopyrrolopyrrole (DPP) cored small molecules with BODIPY end groups as novel donors for organic solar cells
Source: publisher site journal article supplement (doi:10.3762/bjoc.10.283), 2014-11-18
Supplement: Additional file 1 [file 1860-5397-10-283-S1.pdf]

## **Supporting Information**

**for**

# **Solution processable diketopyrrolopyrrole (DPP) cored small molecules with BODIPY end groups as novel donors for organic solar cells**

Diego Cortizo-Lacalle<sup>1</sup>, Calvyn T. Howells<sup>2</sup>, Upendra K. Pandey<sup>2,3</sup>, Joseph Cameron<sup>1</sup>, Neil J. Findlay<sup>1</sup>, Anto Regis Inigo<sup>1</sup>, Tell Tuttle<sup>1</sup>, Peter J. Skabara<sup>\*1</sup> and Ifor D. W. Samuel<sup>\*2</sup>

Address: <sup>1</sup>WestCHEM, Department of Pure and Applied Chemistry, University of Strathclyde, Glasgow, G1 1XL, UK; <sup>2</sup>Organic Semiconductor Centre, SUPA, School of Physics & Astronomy, University of St. Andrews, St. Andrews, KY16 9SS, UK and <sup>3</sup>Present address: Interdisciplinary Centre for Energy Research, Indian Institute of Science, Bangalore 560012, India

Email: Peter J. Skabara<sup>\*</sup> - [peter.skabara@strath.ac.uk](mailto:peter.skabara@strath.ac.uk); Ifor D. W. Samuel - [idws@st-andrews.ac.uk](mailto:idws@st-andrews.ac.uk)

<sup>\*</sup>Corresponding author

**Absorption and emission spectra of compounds 9 and 10 and their fullerene blends; film thickness measurements; surface analysis; representation of device structure; device characteristics; computational data.**

## Photophysics

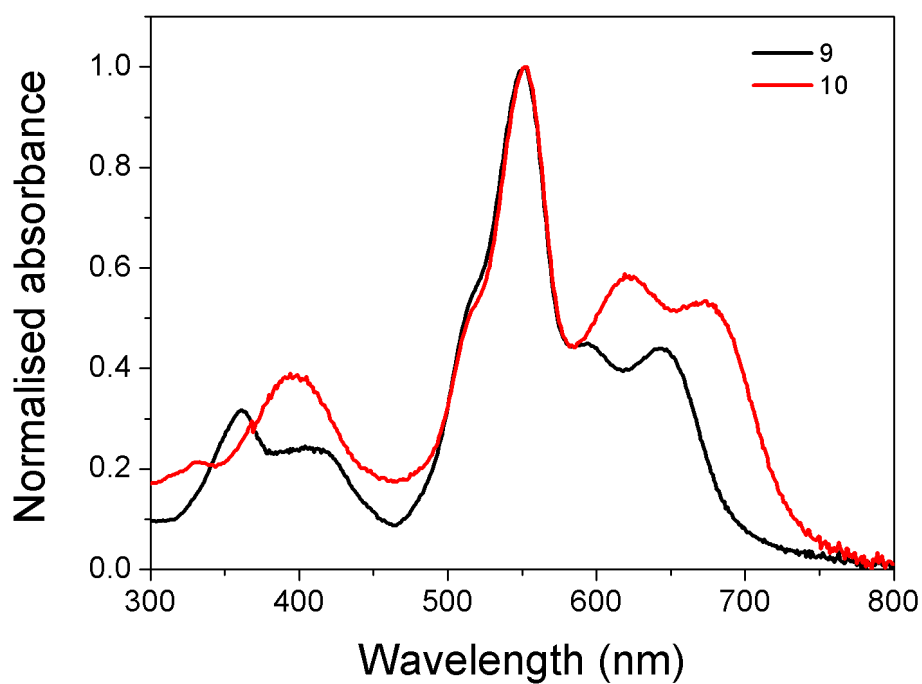

**Figure S1:** Solid state absorption spectra of **9** (black) and **10** (red), spin-coated from chlorobenzene.

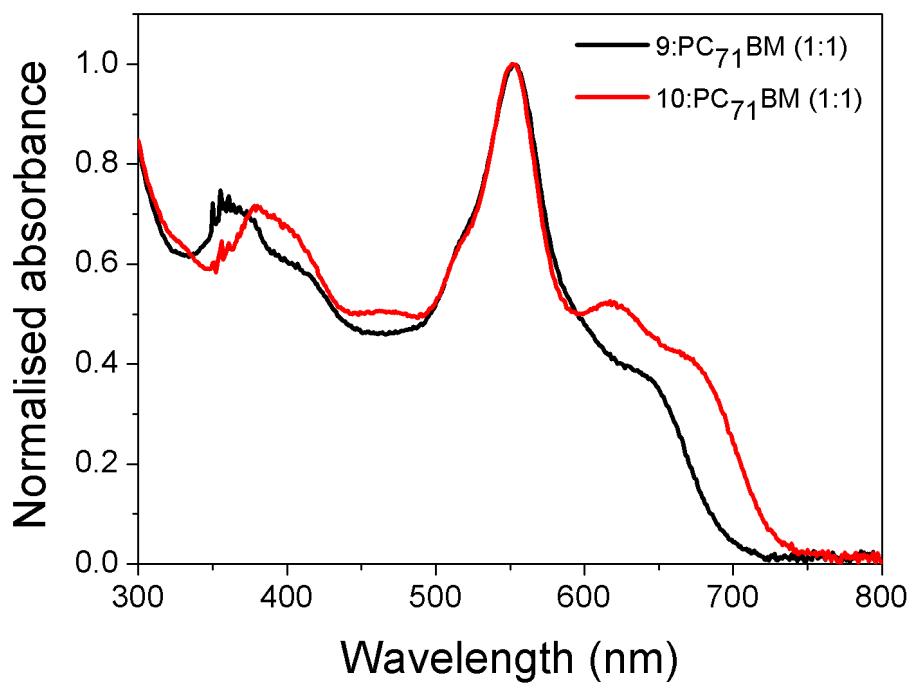

**Figure S2:** Solid state absorption spectra for **9**:PC<sub>71</sub>BM (1:1) (black) and **10**:PC<sub>71</sub>BM (1:1) (red).

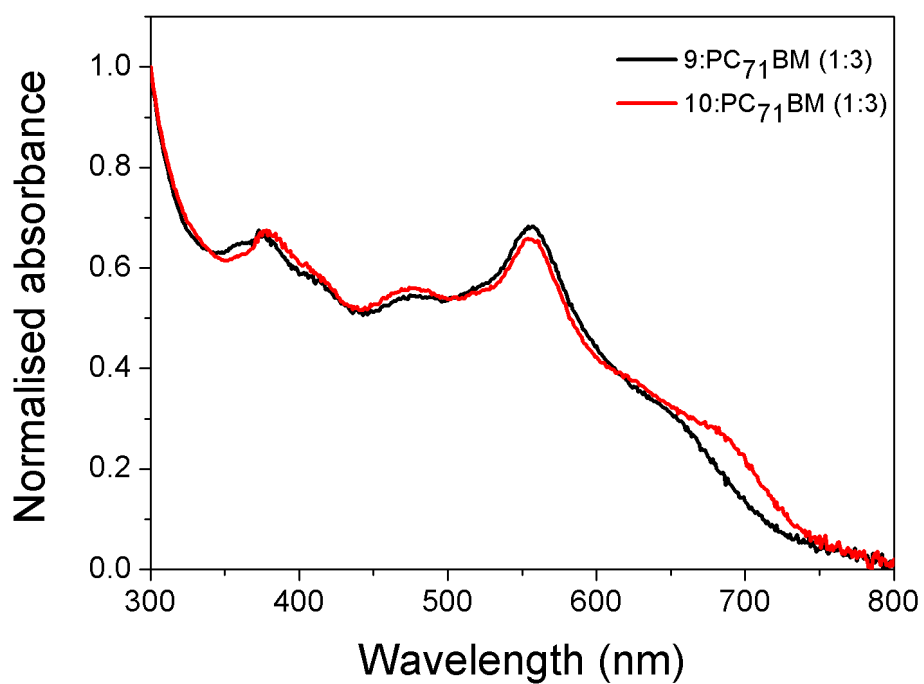

**Figure S3:** Solid state absorption spectra for **9**:PC<sub>71</sub>BM (1:3) (black) and **10**:PC<sub>71</sub>BM (1:3) (red).

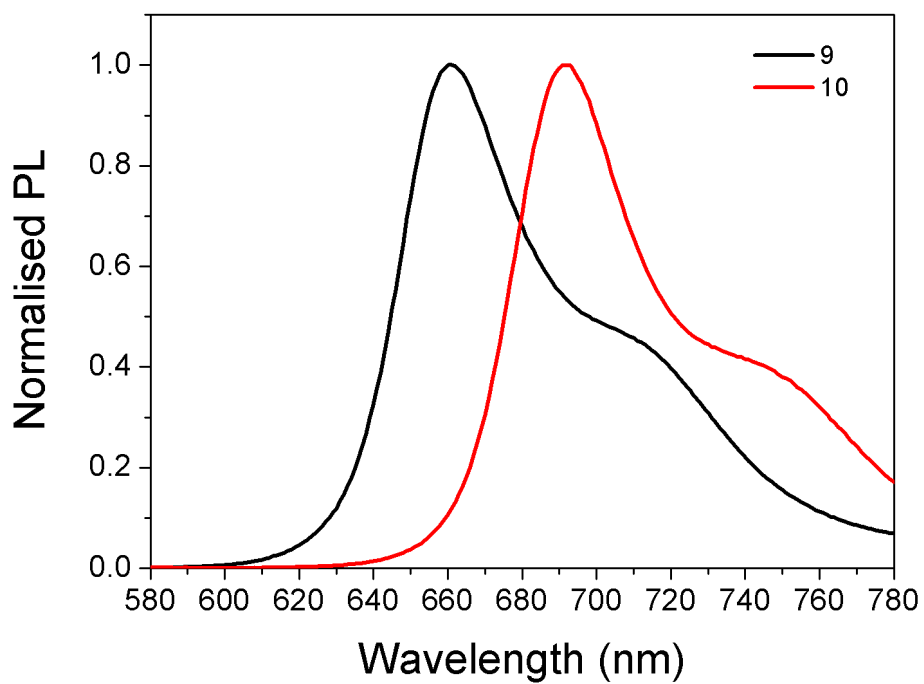

**Figure S4:** Emission spectra of **9** (black) and **10** (red) acquired from 400 nm excitation (dichlorobenzene solution).

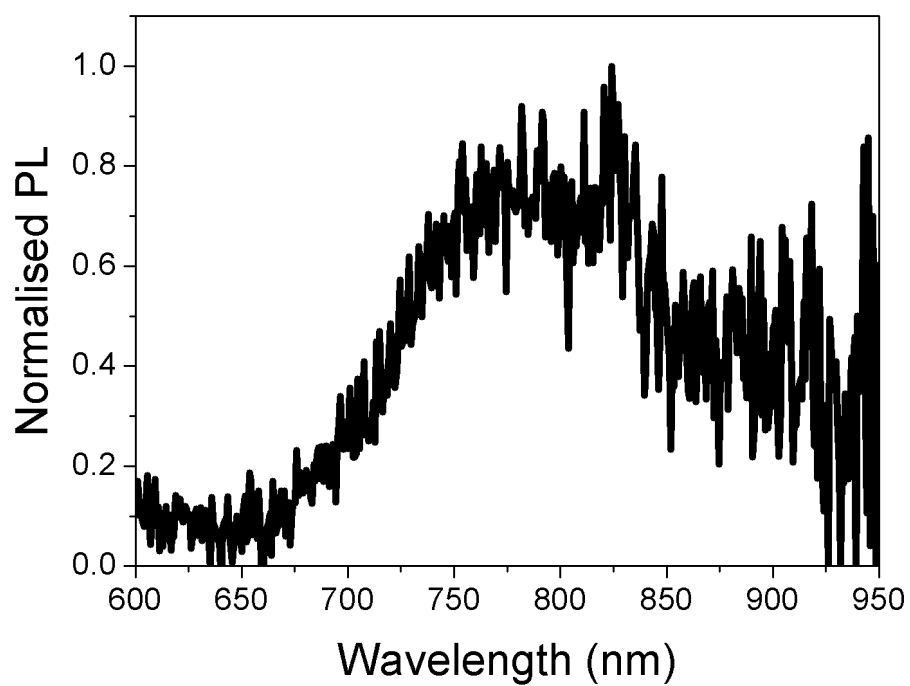

**Figure S5:** Emission spectrum of **9** acquired from 550 nm excitation (solid state).

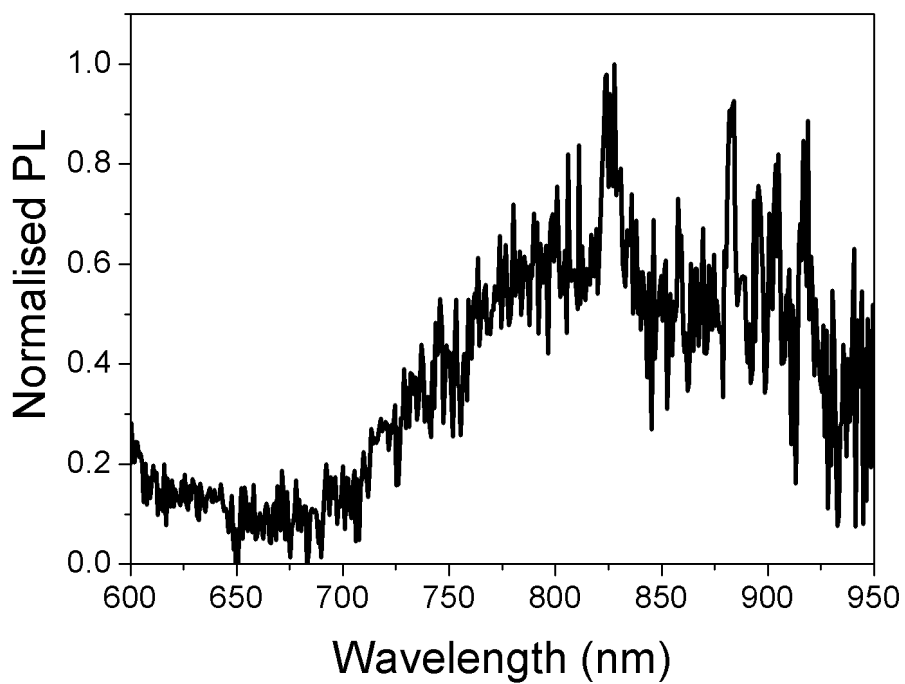

**Figure S6:** Emission spectrum of **10** acquired from 550 nm excitation (solid state).

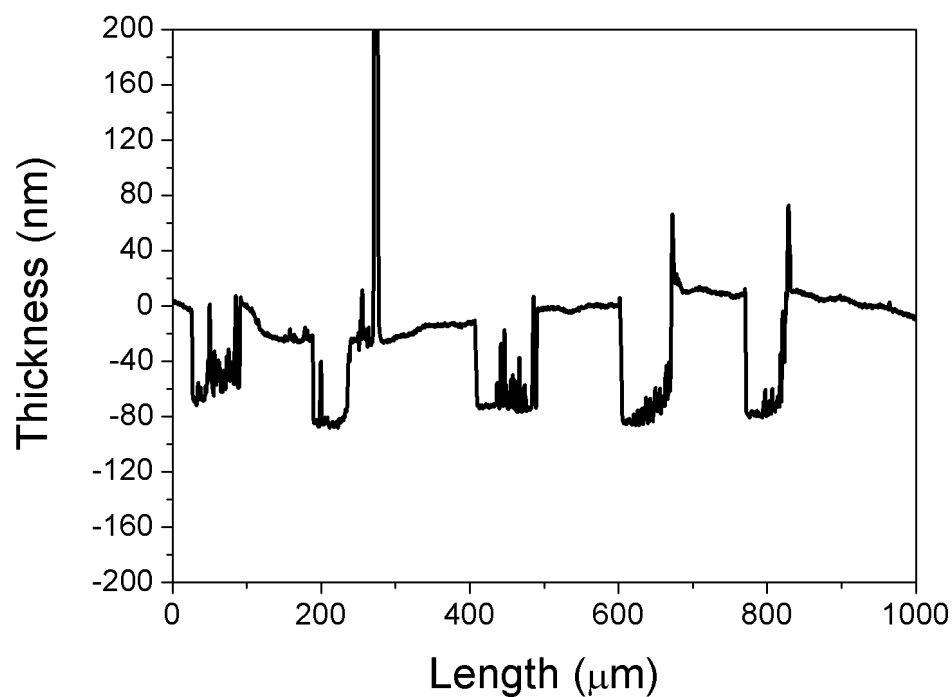

**Figure S7:** Film thickness of **9**:PC<sub>71</sub>BM (1:3) from a Dektak profiler. To get an indication of the film thickness the film has been removed from five separate regions.

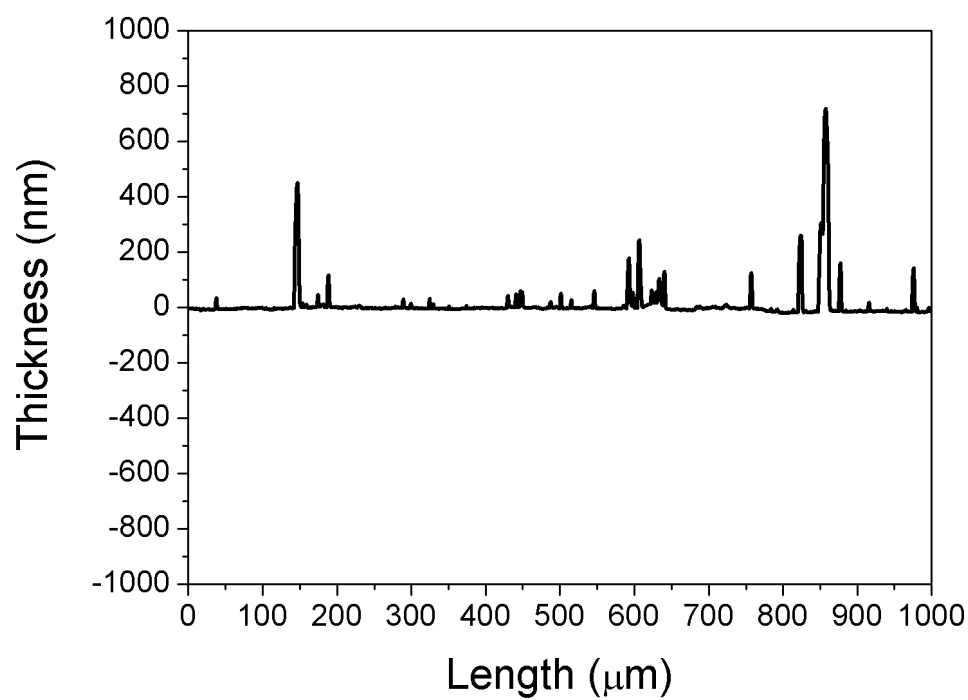

**Figure S8:** Film thickness of **10**:PC<sub>71</sub>BM (1:3) from a Dektak profiler.

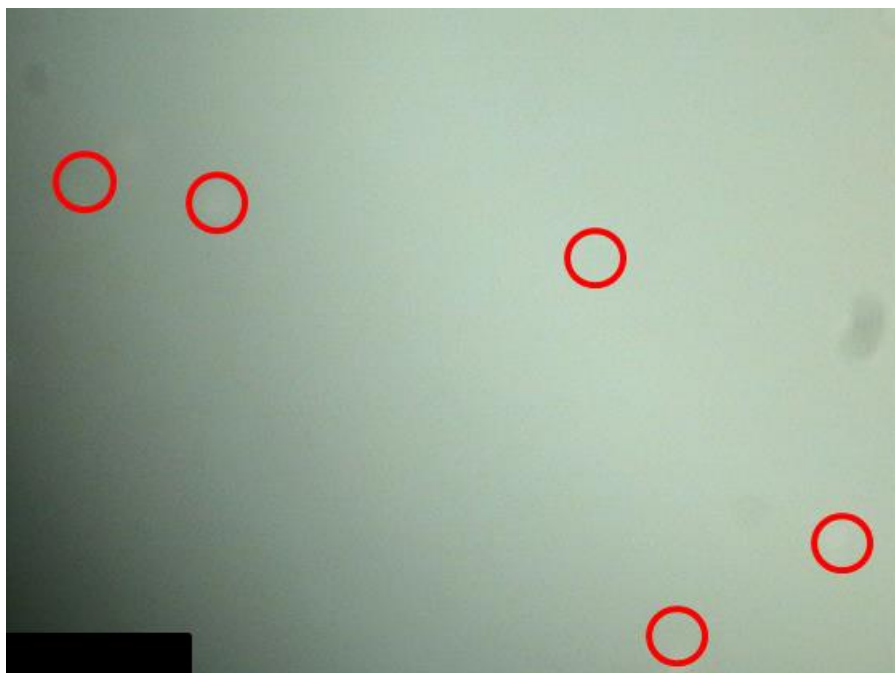

**Figure S9:** Wide-field of **9:PC<sub>71</sub>BM** (1:3). The black scale bar in the bottom left hand corner of the image is 80  $\mu\text{m}$  long. In this image there are five regions where aggregates are observed. These regions are defined with red circles.

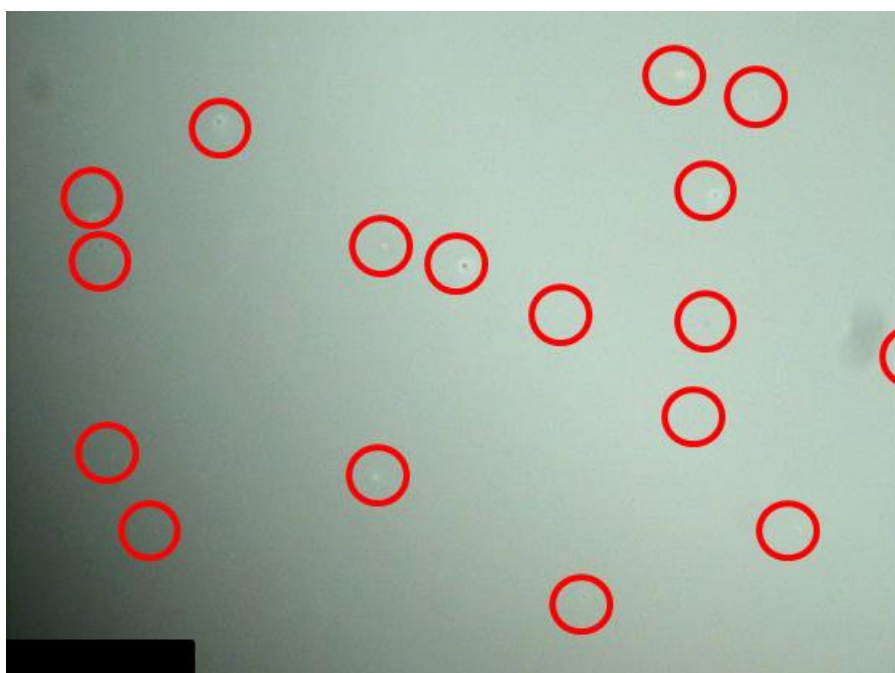

**Figure S10:** Wide-field of **10:PC<sub>71</sub>BM** (1:3). The black scale bar in the bottom left hand corner of the image is 80  $\mu\text{m}$  long. In this image there are seventeen regions where aggregates are observed. These regions are defined with red circles.

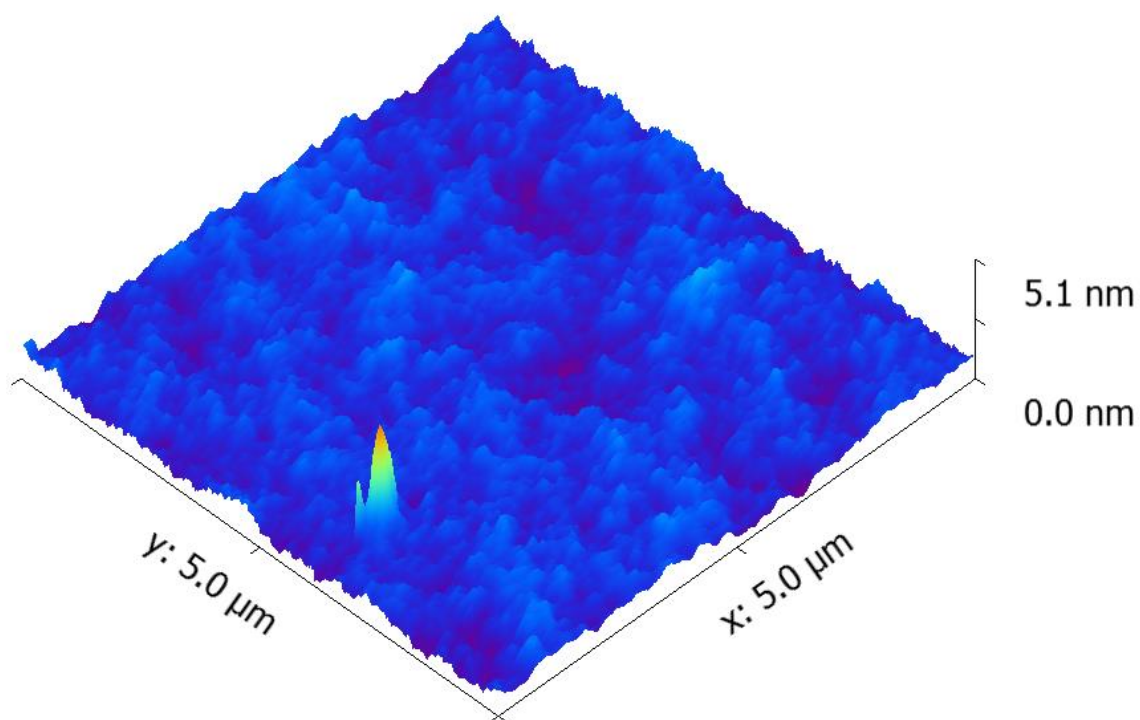

**Figure S11:** Tapping mode AFM height image of **10:PC<sub>71</sub>BM (1:3)** on fused silica substrate.

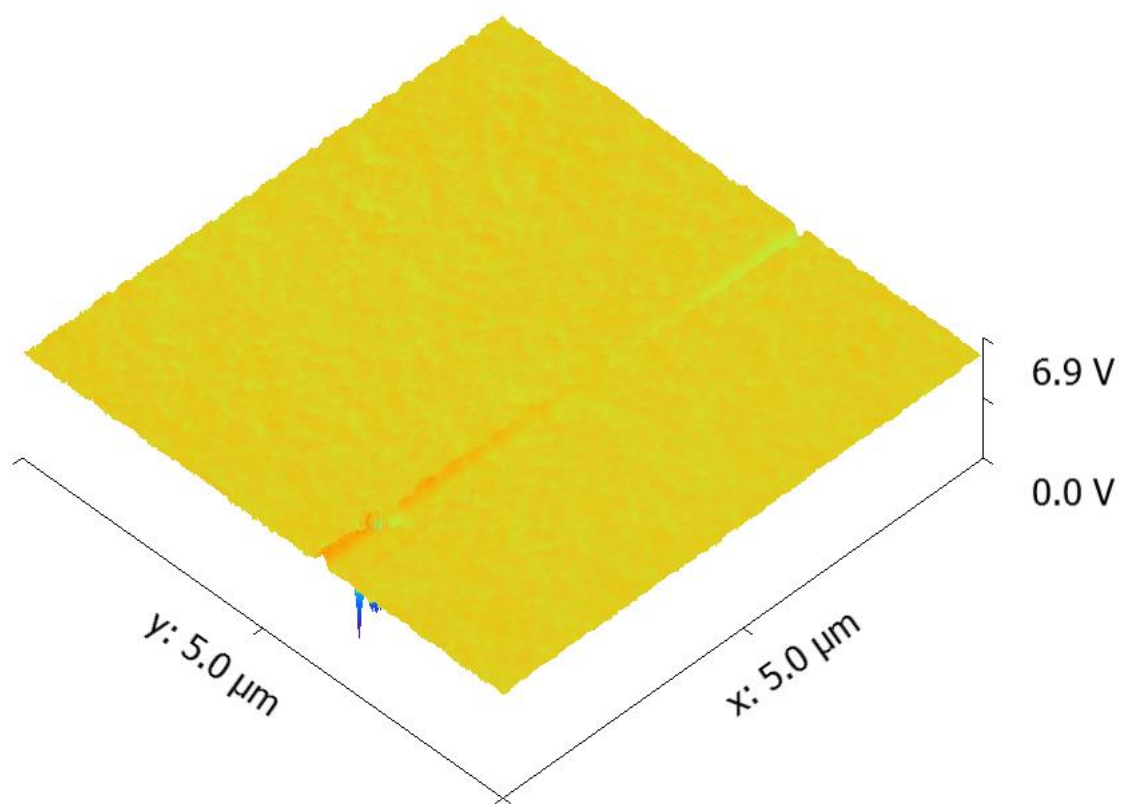

**Figure S12:** Tapping mode AFM phase image of **10:PC<sub>71</sub>BM (1:3)** on fused silica substrate.

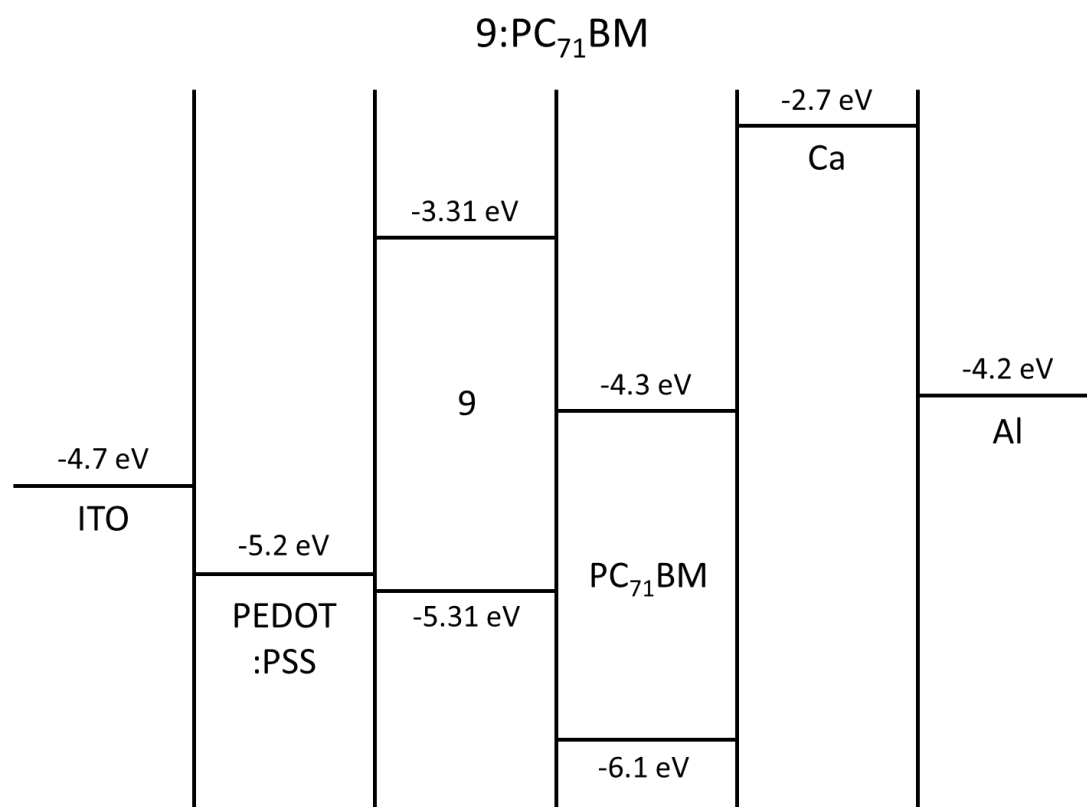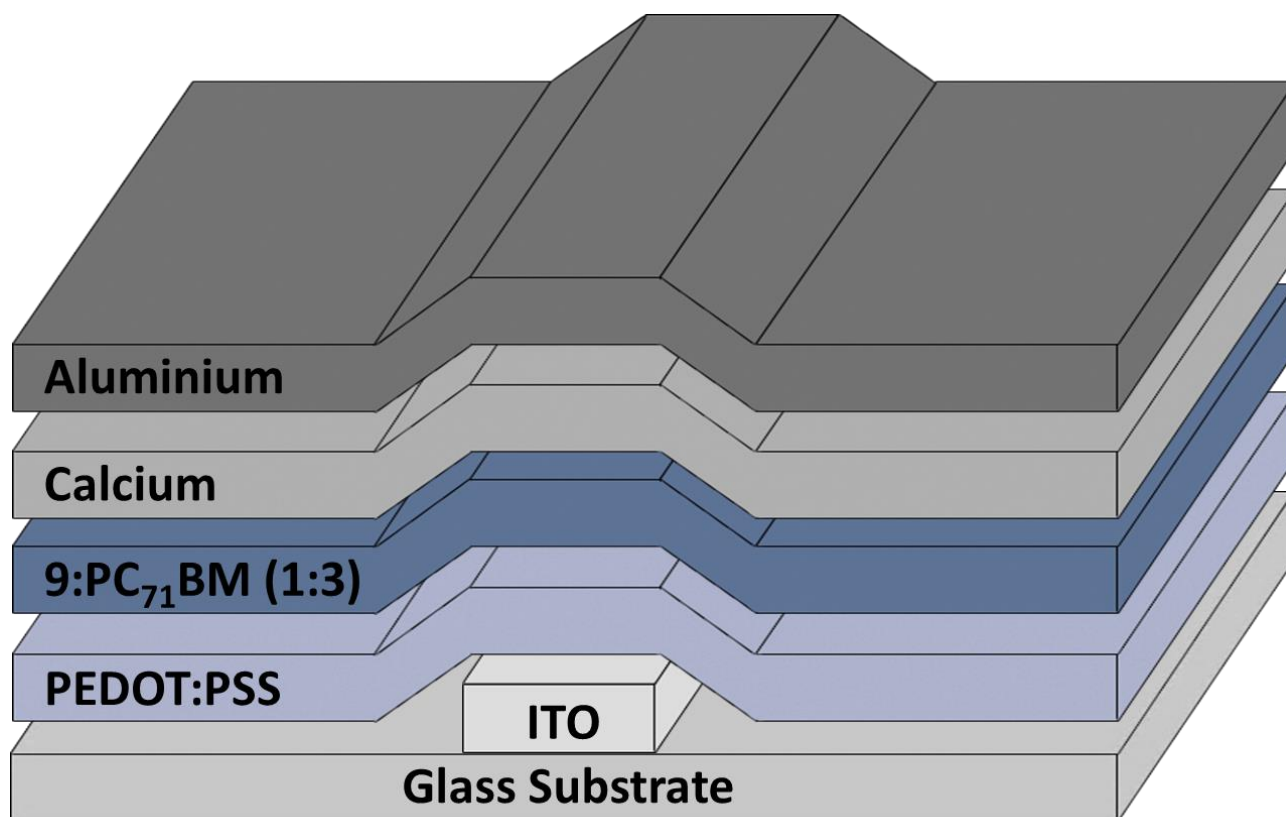

**Figure S13:** Energy levels (top) and device structure (bottom) for 9:PC<sub>71</sub>BM (1:3).



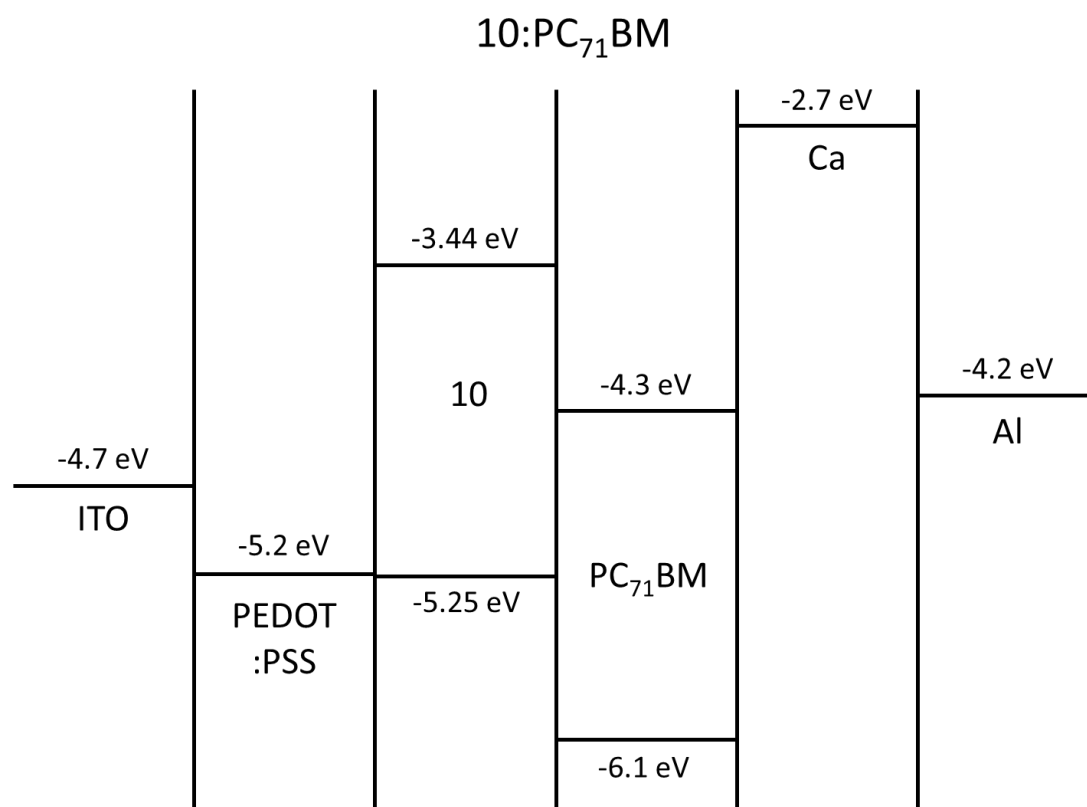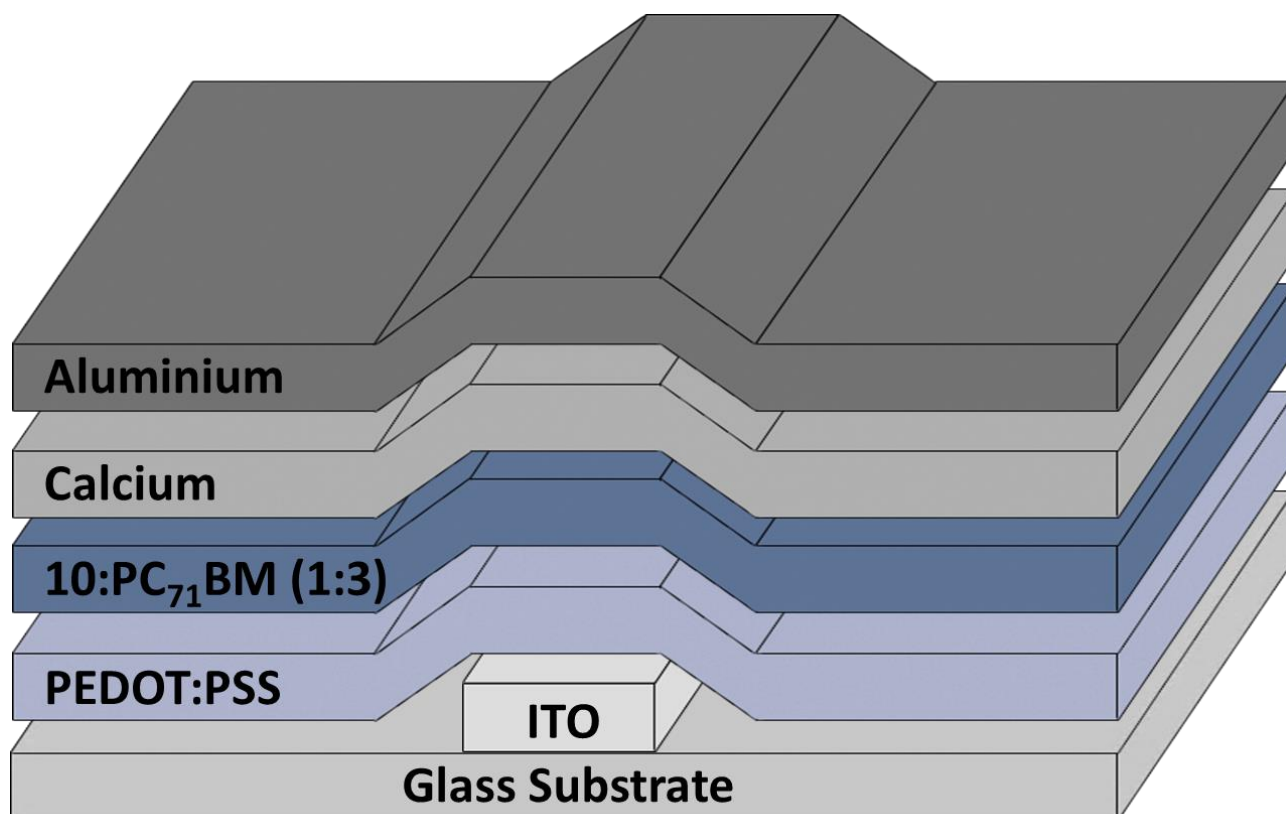

**Figure S14:** Energy levels (top) and device structure (bottom) for **10:PC<sub>71</sub>BM (1:3)**.

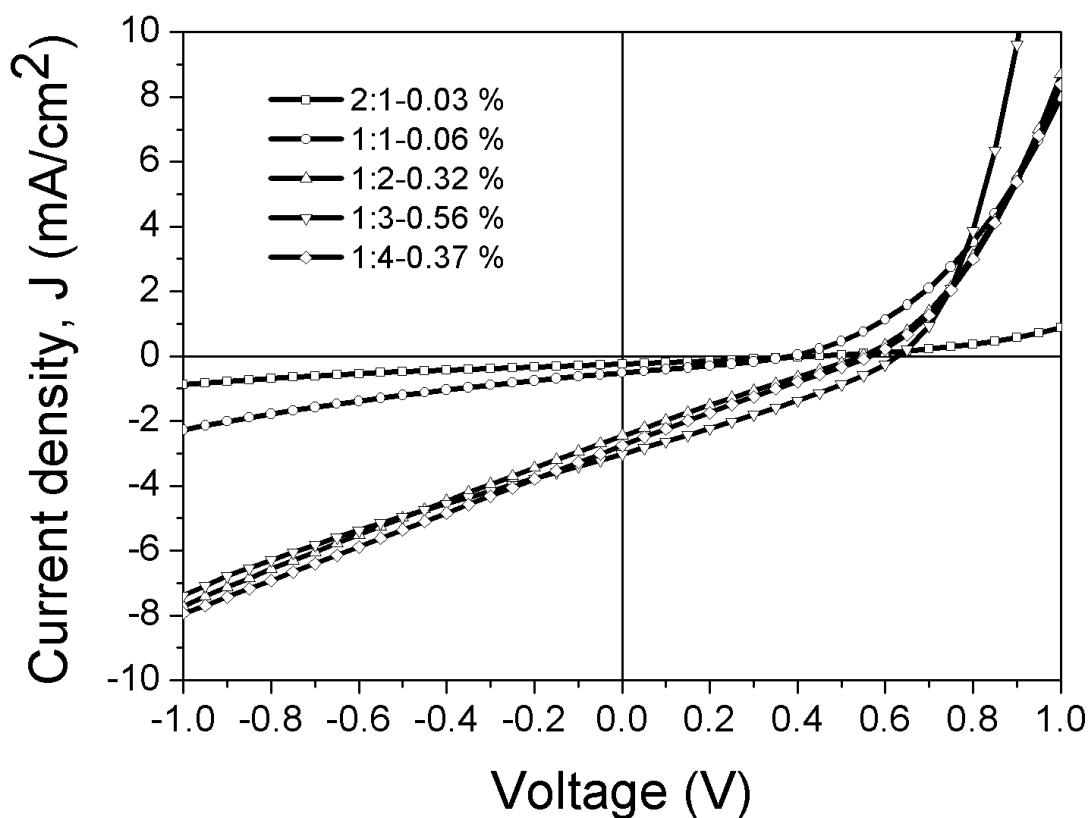

**Figure S15:**  $J$ - $V$  characteristics of **9:PC<sub>71</sub>BM** varying donor/acceptor ratios under  $100 \text{ mW cm}^{-2}$  illumination with a standard AM1.5 G source.

| Donor-Acceptor Ratio | Jsc [mA/cm <sup>2</sup> ] | Voc [V] | FF [%] | PCE [%] |
|----------------------|---------------------------|---------|--------|---------|
| <b>2:1</b>           | 0.24                      | 0.44    | 28     | 0.03    |
| <b>1:1</b>           | 0.51                      | 0.39    | 30     | 0.06    |
| <b>1:2</b>           | 2.46                      | 0.56    | 23     | 0.32    |
| <b>1:3</b>           | 3.02                      | 0.62    | 30     | 0.56    |
| <b>1:4</b>           | 2.76                      | 0.57    | 24     | 0.37    |

**Figure S16:** Device characteristics for various donor/acceptor ratios of **9:PC<sub>71</sub>BM**.

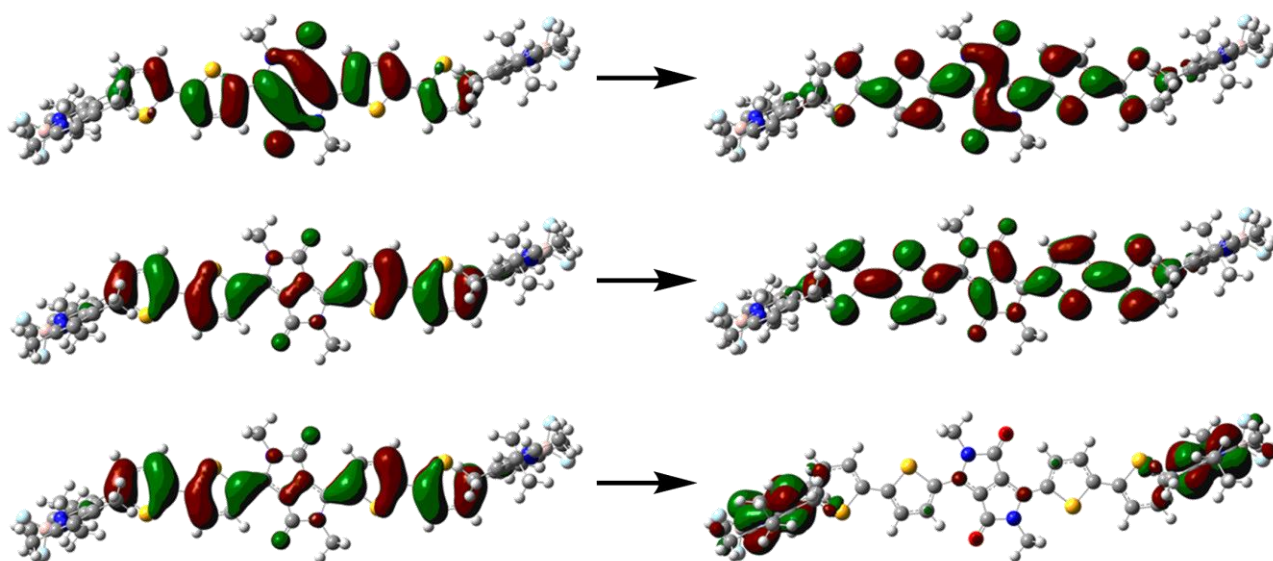

**Figure S17:** Dominant transitions in TDDFT calculation of **9** at 612 nm.

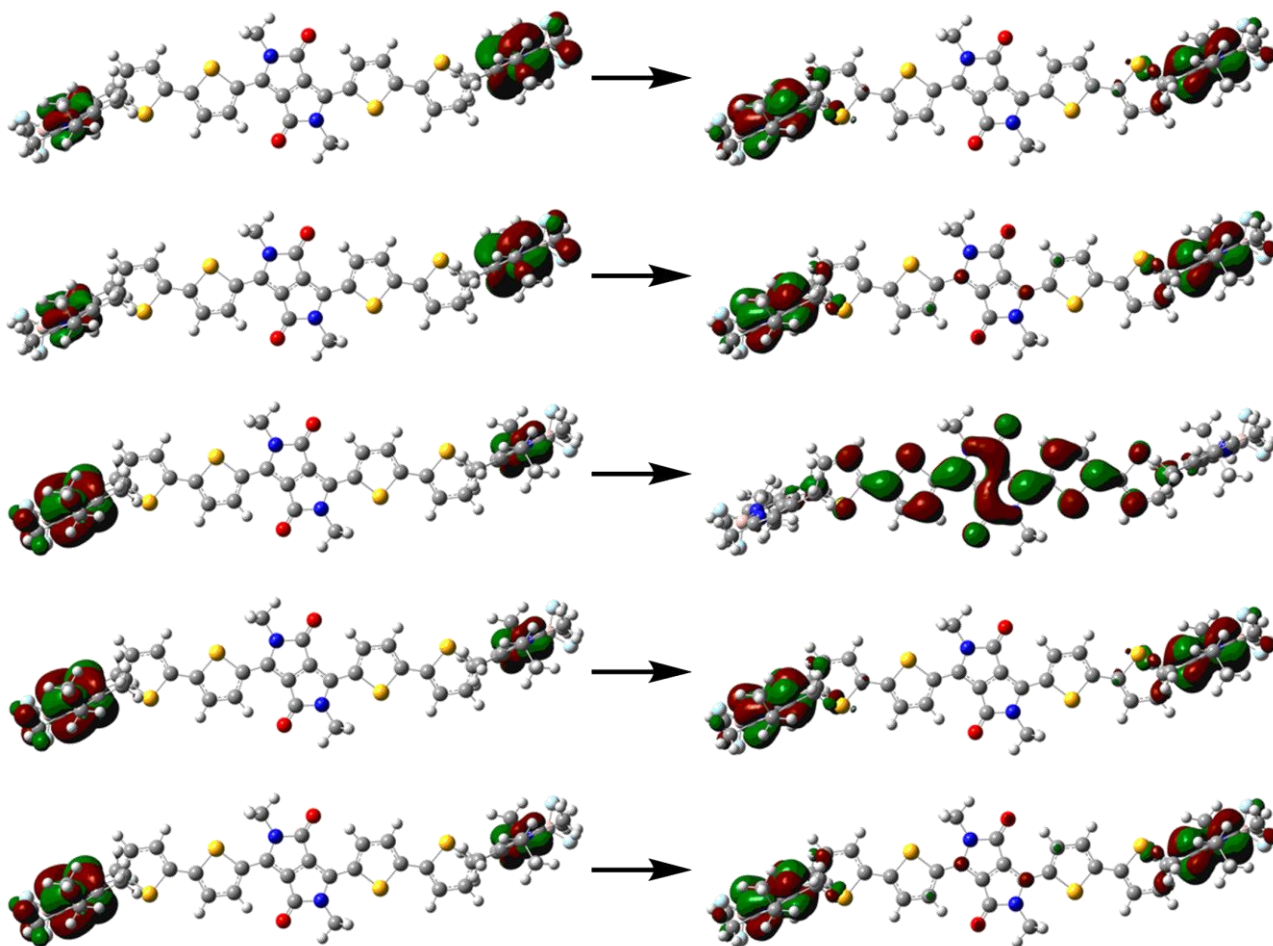

**Figure S18:** Dominant transitions in TDDFT calculation of **9** at 510 nm.

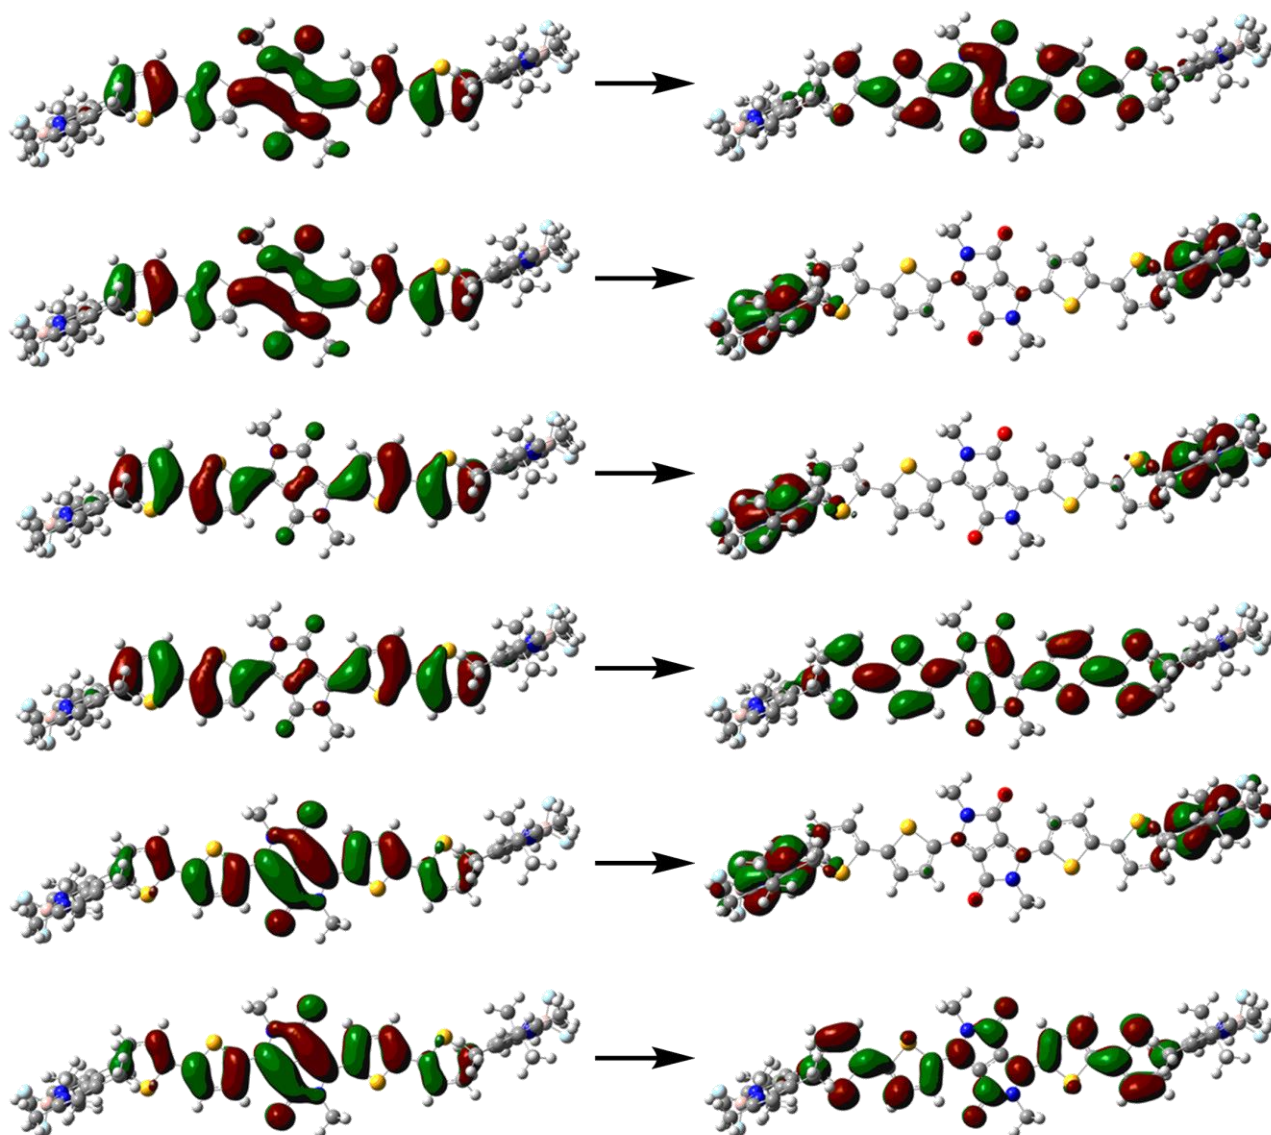

**Figure S19:** Dominant transitions in TDDFT calculation of **9** at 370 nm.

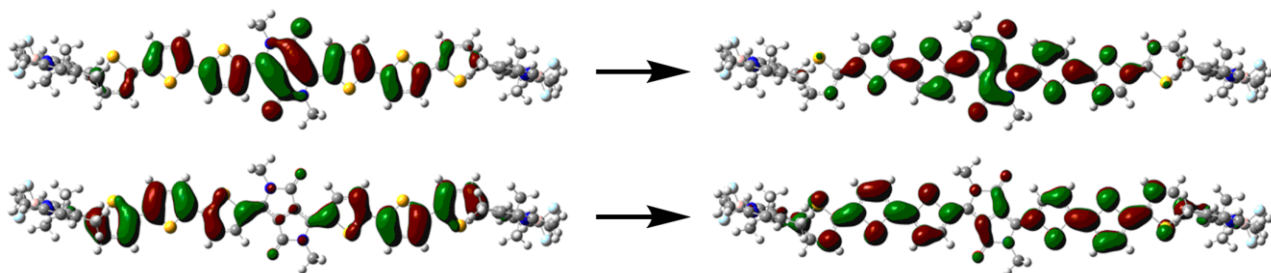

**Figure S20:** Dominant transitions in TDDFT calculation of **10** at 641 nm.

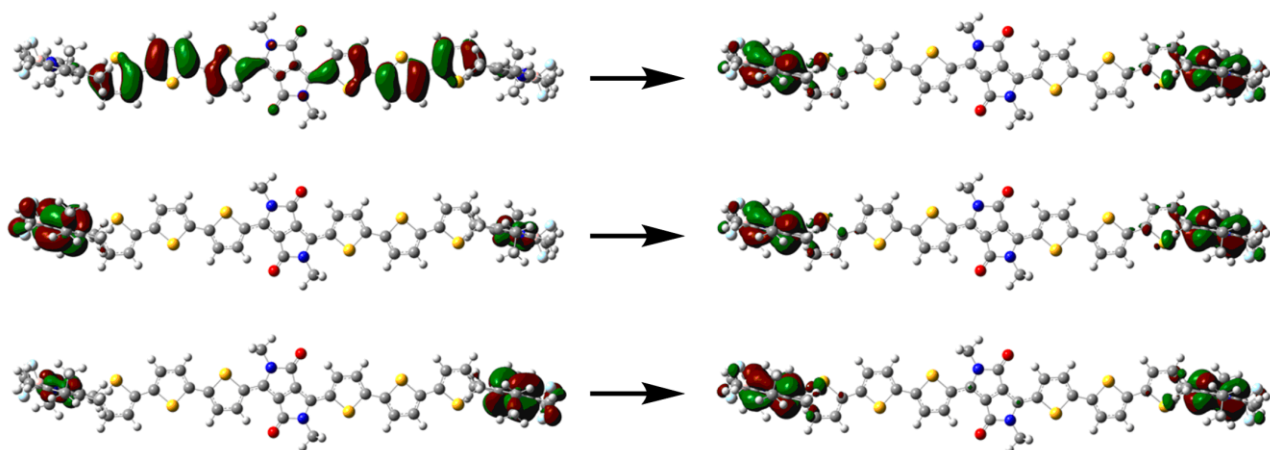

**Figure S21:** Dominant transitions in TDDFT calculation of **10** at 510 nm.

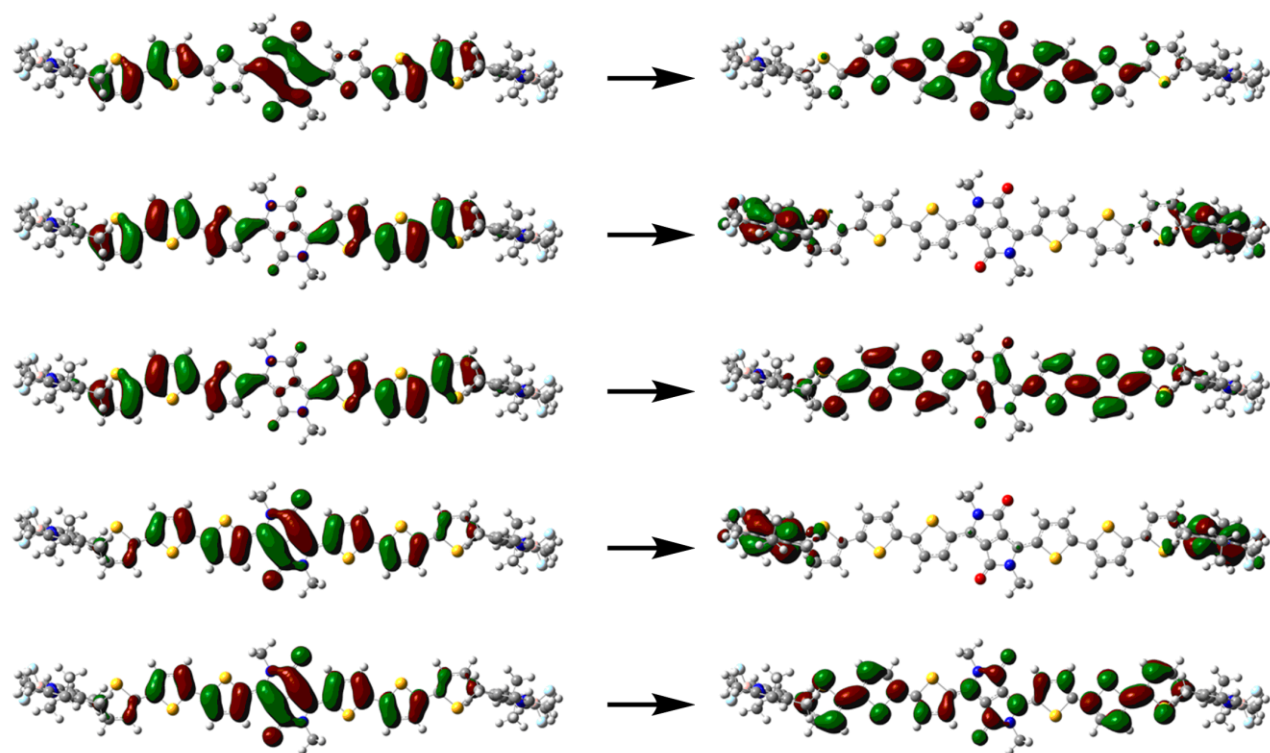

**Figure S22:** Dominant transitions in TDDFT calculation of **10** at 403 nm.

**Table S1.** TDDFT Results

| Compound  | Calculated<br>Absorption<br>peaks / nm | Transitions                                                                                                                                                                         |
|-----------|----------------------------------------|-------------------------------------------------------------------------------------------------------------------------------------------------------------------------------------|
| <b>9</b>  | 612                                    | HOMO→LUMO ( <b>75%</b> ); HOMO-3→LUMO+2 ( <b>12%</b> );<br>HOMO-3→LUMO+3 ( <b>13%</b> )                                                                                             |
|           | 510                                    | HOMO-2→LUMO+1 ( <b>32%</b> ); HOMO-2→LUMO+2<br>( <b>12%</b> ); HOMO-1→LUMO ( <b>9%</b> ); HOMO-1→LUMO+1<br>( <b>15%</b> ); HOMO-1→LUMO+2 ( <b>32%</b> )                             |
|           | 370                                    | HOMO-4→LUMO ( <b>20%</b> ); HOMO-4→LUMO+2 ( <b>13%</b> );<br>HOMO-3→LUMO+1 ( <b>24%</b> ); HOMO-3→LUMO+3<br>( <b>7%</b> ); HOMO→LUMO+2 ( <b>27%</b> ); HOMO→LUMO+4<br>( <b>9%</b> ) |
| <b>10</b> | 641                                    | HOMO→LUMO ( <b>83%</b> ); HOMO-3→LUMO+3 ( <b>17%</b> )                                                                                                                              |
|           | 510                                    | HOMO-3→LUMO+1 ( <b>35%</b> ); HOMO-2→LUMO+1<br>( <b>23%</b> ); HOMO-1→LUMO+2 ( <b>42%</b> )                                                                                         |
|           | 403                                    | HOMO-4→LUMO ( <b>32%</b> ); HOMO-3→LUMO+1 ( <b>14%</b> );<br>HOMO-3→LUMO+3 ( <b>23%</b> ); HOMO→LUMO+2<br>( <b>10%</b> ); HOMO→LUMO+4 ( <b>21%</b> )                                |
